# Supplementary material for: The Rise of Pregnancy Apps and the Implications for Culturally and Linguistically Diverse Women: Narrative Review
Source: PubMed Central journal article supplement (PMC6269626; doi:10.2196/mhealth.9119), 2018-11-16
Supplement: mhealth_v6i11e189_app2.pdf [file mhealth_v6i11e189_app2.pdf]

| Article                     | Research method                     | participants/<br>data source                     | Ethnicity, socioeconomic and educational levels of participants (where applicable) | Participants who used apps | Preferred functionalities/ positive features                                                                                                                                                                                                                                                                                                                                             | Identified issues with using apps                                                                                                                                                                                                                                                                                                                                                                                                                                                                                                                                                                                            | Location            |
|-----------------------------|-------------------------------------|--------------------------------------------------|------------------------------------------------------------------------------------|----------------------------|------------------------------------------------------------------------------------------------------------------------------------------------------------------------------------------------------------------------------------------------------------------------------------------------------------------------------------------------------------------------------------------|------------------------------------------------------------------------------------------------------------------------------------------------------------------------------------------------------------------------------------------------------------------------------------------------------------------------------------------------------------------------------------------------------------------------------------------------------------------------------------------------------------------------------------------------------------------------------------------------------------------------------|---------------------|
| Bert et al (2015)           | app review                          | The 9 most commonly cited pregnancy-related apps | N/A                                                                                | N/A                        | <ul style="list-style-type: none"> <li>All apps were available from the Apple App Store, almost all were available from the Google Play Store.</li> <li>Most apps were entirely free, or at least some functionality was free.</li> <li>These apps provide information on "all the different aspects of the gestation..."</li> <li>Social connection - direct links to forums</li> </ul> | <ul style="list-style-type: none"> <li>Only two apps were available in multiple languages.</li> <li>6/9 apps did not include information about the reliability of app content and/or the presence of a scientific board ensuring evidence-based contents.</li> <li>4/9 apps did not contain a privacy policy.</li> </ul>                                                                                                                                                                                                                                                                                                     | International       |
| Dalton et al (2014)         | focus groups, interviews and survey | 21 midwives                                      | N/A                                                                                | N/A                        | <ul style="list-style-type: none"> <li>May help to alleviate time constraints as a factor in communicating information to women during appointments</li> <li>One-to-one communication rather than group</li> </ul>                                                                                                                                                                       | <ul style="list-style-type: none"> <li>Communication with women in online contexts is problematic because of difficulties in correctly interpreting "tone", lack of non-verbal cues and ability to observe women's condition physically; medicolegal risks for health professionals;</li> <li>the potential and danger for misinterpretation of information given to be taken "out of context";</li> <li>the potential blurring of professional and personal roles</li> <li>Moving to online information provision may result in added work</li> <li>Uncertainty about the quality of information being provided.</li> </ul> | Adelaide, Australia |
| Farag, Chyjek & Chen (2014) | app review                          | 548 pregnancy apps in the Apple App Store        | N/A                                                                                | N/A                        |                                                                                                                                                                                                                                                                                                                                                                                          | 30/548 (5.5%) apps were considered "potentially useful to obstetricians-gynaecologists"                                                                                                                                                                                                                                                                                                                                                                                                                                                                                                                                      | international       |

| Article                                                          | Research method                                       | participants/<br>data source                                                                                                        | Ethnicity, socioeconomic and educational levels of participants (where applicable) | Participants who used apps                                                            | Preferred functionalities/ positive features                                                                                                                                                                                                                                                                                                                                                                                                                                                                                                             | Identified issues with using apps                                                                                                                                                                                                                                                                                                                                                                                                                                                                                                     | Location                     |
|------------------------------------------------------------------|-------------------------------------------------------|-------------------------------------------------------------------------------------------------------------------------------------|------------------------------------------------------------------------------------|---------------------------------------------------------------------------------------|----------------------------------------------------------------------------------------------------------------------------------------------------------------------------------------------------------------------------------------------------------------------------------------------------------------------------------------------------------------------------------------------------------------------------------------------------------------------------------------------------------------------------------------------------------|---------------------------------------------------------------------------------------------------------------------------------------------------------------------------------------------------------------------------------------------------------------------------------------------------------------------------------------------------------------------------------------------------------------------------------------------------------------------------------------------------------------------------------------|------------------------------|
| Fleming, Vandermause & Shaw (2014),                              | Focus groups                                          | 7 primiparous women who had recently given birth<br>Diverse maternal care providers (12 across 3 focus groups)<br>app investigation | low-income women                                                                   | not stated                                                                            |                                                                                                                                                                                                                                                                                                                                                                                                                                                                                                                                                          | <ul style="list-style-type: none"> <li>Pregnant women's information-seeking can result in increased anxiety and fear.</li> <li>Most women did not talk to their health care providers about their information-seeking.</li> <li>Information acquired from electronic sources was often "fragmented, inconsistent, ... poorly referenced"</li> <li>Women often received advice from new "friends" in online communities</li> <li>Few of the pregnancy or birthing apps included contact information or 'about us' sections.</li> </ul> | Pacific North-West, U.S.     |
| Goetz et al (2017)                                               | interview and questionnaire                           | 30 pregnant women                                                                                                                   | highly educated, high socioeconomic status                                         | 60% were "regular users"                                                              | <ul style="list-style-type: none"> <li>interactive/pregnancy tracking</li> <li>accessibility/convenience</li> <li>social connection</li> <li>reliable source/link to clinical care</li> <li>data sharing</li> </ul>                                                                                                                                                                                                                                                                                                                                      | trustworthiness of content<br>data security                                                                                                                                                                                                                                                                                                                                                                                                                                                                                           | Germany                      |
| Hearn, Miller & Fletcher (2013)<br>Hearn, Miller & Lester (2014) | Interviews and focus groups<br>App and website launch | 76 health care providers<br>56 pregnant women<br>64 postnatal women                                                                 | urban and rural participants, low and medium socioeconomic levels                  | 7% of all pregnant women and 18% of first-time mothers used the app in its first year | <p>Women:</p> <ul style="list-style-type: none"> <li>reliable source/link to clinical care</li> <li>succinct information provision (with links to more detailed information if wanted)</li> <li>Interactive/pregnancy tracking</li> <li>social connection</li> <li>information provision in stages of pregnancy format</li> </ul> <p>Health care providers:</p> <ul style="list-style-type: none"> <li>information provision</li> <li>links to support</li> <li>easy and fun interface (include images, animations, etc)</li> <li>interactive</li> </ul> | <ul style="list-style-type: none"> <li>trustworthiness of content lower use in areas of social disadvantage.</li> <li>specialised content needed for indigenous and non-English speaking women.</li> <li>possible internet/smartphone access issues in remote/disadvantaged areas.</li> </ul>                                                                                                                                                                                                                                         | Western Australia, Australia |
| Johnson (2014)                                                   | Interviews                                            | 12 perinatal women                                                                                                                  | No information provided                                                            | N/A                                                                                   | <ul style="list-style-type: none"> <li>accessibility/convenience</li> <li>succinct information provision - 'tidbitisation'</li> </ul>                                                                                                                                                                                                                                                                                                                                                                                                                    |                                                                                                                                                                                                                                                                                                                                                                                                                                                                                                                                       | Sydney, Australia            |

| Article                                              | Research method                                                        | participants/<br>data source                                                              | Ethnicity, socioeconomic and educational levels of participants (where applicable)                                                                                         | Participants who used apps | Preferred functionalities/ positive features                                                                                                                                                                                                                                                                                                            | Identified issues with using apps                                                                                                                                                                                                                                                                                                                                                                                        | Location          |
|------------------------------------------------------|------------------------------------------------------------------------|-------------------------------------------------------------------------------------------|----------------------------------------------------------------------------------------------------------------------------------------------------------------------------|----------------------------|---------------------------------------------------------------------------------------------------------------------------------------------------------------------------------------------------------------------------------------------------------------------------------------------------------------------------------------------------------|--------------------------------------------------------------------------------------------------------------------------------------------------------------------------------------------------------------------------------------------------------------------------------------------------------------------------------------------------------------------------------------------------------------------------|-------------------|
|                                                      |                                                                        |                                                                                           |                                                                                                                                                                            |                            | <ul style="list-style-type: none"> <li>social connection</li> </ul>                                                                                                                                                                                                                                                                                     |                                                                                                                                                                                                                                                                                                                                                                                                                          |                   |
| Kennedy et al (2017)                                 | questionnaire                                                          | 101 pregnant women                                                                        | No information on ethnicity given, Range of educational and socioeconomic levels represented                                                                               | 87%                        | <ul style="list-style-type: none"> <li>Social connection</li> <li>Information provision</li> <li>Accessibility/convenience</li> <li>interactive/pregnancy tracking</li> </ul>                                                                                                                                                                           | Women used mainly commercially developed resources, not publicly-funded or academically-supported resources, raising the possibility of them receiving conflicting or erroneous advice.                                                                                                                                                                                                                                  | Dublin, Ireland   |
| Kraschnewski et al. (2014) Peyton (2014), C          | Focus groups only (Kraschnewski), Focus groups and interviews (Peyton) | 17 pregnant women (4 focus groups), 6 perinatal women (interviews), all smartphone owners | "Mostly white" (14/17 in focus groups), lower socioeconomic status                                                                                                         | 100%                       | <ul style="list-style-type: none"> <li>information provision</li> <li>Interactive/pregnancy tracking</li> <li>social connection</li> <li>Regular notifications/reminders</li> <li>Interactive (eg. photo sharing capability, personalisation)</li> <li>Succinct information provision</li> <li>Stages of pregnancy format/pregnancy tracking</li> </ul> | <ul style="list-style-type: none"> <li>trustworthiness of content</li> <li>accessibility concerns (ehealth literacy); Lack of support in apps for spouses. Gendered design of apps is alienating for spouses.</li> <li>Disinterest in and distrust of pregnancy discussion forums, social media venues, and chat rooms.</li> <li>Too much information seeking can lead to confusion</li> </ul>                           | Pennsylvania, US  |
| Lee & Moon (2016)                                    | user survey and app review                                             | 193 pregnant women (smartphone owners)<br>The apps (n=47) used by the women               | The majority of participants had at least an undergraduate degree (73.1%). All had completed high school. Most were of medium (38.3%) to high (46.1) socioeconomic status. | 55%                        | <ul style="list-style-type: none"> <li>information provision</li> <li>accessibility/convenience</li> <li>Social connection</li> <li>link to clinical care (Q&amp;A sessions)</li> </ul>                                                                                                                                                                 | <p>Women:</p> <ul style="list-style-type: none"> <li>trustworthiness of content</li> </ul> <p>App review:</p> <ul style="list-style-type: none"> <li>provision of information sources and warnings about using information related to pregnancy, birth and child care had low credibility</li> <li>internet portal or commercial sites were the most common developers of apps, not healthcare organisations.</li> </ul> | Daegu, Korea      |
| Lupton & Pedersen (2015)<br>Lupton & Pedersen (2016) | Survey                                                                 | 410 pregnant or recently pregnant women                                                   | Predominantly city dwellers, highly educated, Anglo or Western European background                                                                                         | 73%                        | <ul style="list-style-type: none"> <li>information provision</li> <li>Interactive/pregnancy tracking</li> <li>social connection</li> </ul>                                                                                                                                                                                                              |                                                                                                                                                                                                                                                                                                                                                                                                                          | Australia-wide    |
| Lupton (2016)                                        | Focus group (follow up to                                              | 36 pregnant or recently pregnant women (4 focus groups)                                   | English-speaking, city dwellers, highly-educated                                                                                                                           | High                       | <ul style="list-style-type: none"> <li>Multifunctionality</li> <li>accessibility/convenience</li> <li>social connection</li> <li>reliable source/link to clinical</li> </ul>                                                                                                                                                                            | agendas of commercial entities                                                                                                                                                                                                                                                                                                                                                                                           | Sydney, Australia |

| Article                                       | Research method          | participants/<br>data source                        | Ethnicity, socioeconomic and educational levels of participants (where applicable)                                                 | Participants who used apps                               | Preferred functionalities/ positive features                                                                                                                                                                                                                                                                   | Identified issues with using apps                                                                                                                                                                                                                                                                                                                                                                                                                                                                        | Location                   |
|-----------------------------------------------|--------------------------|-----------------------------------------------------|------------------------------------------------------------------------------------------------------------------------------------|----------------------------------------------------------|----------------------------------------------------------------------------------------------------------------------------------------------------------------------------------------------------------------------------------------------------------------------------------------------------------------|----------------------------------------------------------------------------------------------------------------------------------------------------------------------------------------------------------------------------------------------------------------------------------------------------------------------------------------------------------------------------------------------------------------------------------------------------------------------------------------------------------|----------------------------|
|                                               | quantitative survey)     |                                                     |                                                                                                                                    |                                                          | care                                                                                                                                                                                                                                                                                                           |                                                                                                                                                                                                                                                                                                                                                                                                                                                                                                          |                            |
| O'Donnell, Lewkowicz, Vargas & Zlatnik (2016) | qualitative app analysis | Two free, nationally-endorsed (U.S.) pregnancy apps | N/A                                                                                                                                | N/A                                                      |                                                                                                                                                                                                                                                                                                                | <ul style="list-style-type: none"> <li>Content between apps varied widely; one had no information on: alternative medications and exercises, constraints to physical activity, labour and delivery and postnatal care</li> <li>In both apps, less than 20% of content explicitly addressed recommended prenatal care information</li> <li>Examples found of incomplete/confusing information</li> <li>Gap in educational content (no information regarding postpartum contraception planning)</li> </ul> | U.S.                       |
| O'Higgins et al 2014                          | Questionnaire            | 522 perinatal women                                 | literate (English language), urban and rural participants, spanning all socioeconomic groups<br>No information regarding ethnicity | Of smartphone owners (76%), 59% had used a pregnancy app | <ul style="list-style-type: none"> <li>Regular notifications/reminders</li> <li>Information provision in stages of pregnancy format (eg. weekly texts)</li> <li>Videos</li> <li>Specific apps (general pregnancy, nutrition, exercise, smoking cessation)</li> <li>Social connection (forums, blog)</li> </ul> |                                                                                                                                                                                                                                                                                                                                                                                                                                                                                                          | Dublin, Ireland            |
| Prescott & Mackie (2017)                      | Interview                | 16 pregnant women                                   | No information provided                                                                                                            | not stated                                               | <ul style="list-style-type: none"> <li>reliable source</li> <li>information provision</li> <li>Interactive/pregnancy tracking</li> </ul>                                                                                                                                                                       | <ul style="list-style-type: none"> <li>trustworthiness of content</li> <li>difficulty knowing when to stop looking</li> <li>access to too much information ("horror stories")</li> </ul>                                                                                                                                                                                                                                                                                                                 | England                    |
| Rodger et al. (2013)                          | interview                | 35 pregnant women                                   | predominantly Anglo-Australian (32/35), and from a low socioeconomic area (66%)                                                    | 40%                                                      | accessibility/convenience                                                                                                                                                                                                                                                                                      | trustworthiness of content (anecdotal)                                                                                                                                                                                                                                                                                                                                                                                                                                                                   | South Australia, Australia |

| Article                              | Research method                     | participants/<br>data source                                                                                                      | Ethnicity, socioeconomic and educational levels of participants (where applicable)                                                                                    | Participants who used apps | Preferred functionalities/ positive features                                                                                                                                                                                                                                                                                                                                                                                    | Identified issues with using apps                                                                                                                                                                                                                                                                                                                                                                                                                                                                                                                       | Location                         |
|--------------------------------------|-------------------------------------|-----------------------------------------------------------------------------------------------------------------------------------|-----------------------------------------------------------------------------------------------------------------------------------------------------------------------|----------------------------|---------------------------------------------------------------------------------------------------------------------------------------------------------------------------------------------------------------------------------------------------------------------------------------------------------------------------------------------------------------------------------------------------------------------------------|---------------------------------------------------------------------------------------------------------------------------------------------------------------------------------------------------------------------------------------------------------------------------------------------------------------------------------------------------------------------------------------------------------------------------------------------------------------------------------------------------------------------------------------------------------|----------------------------------|
| Scott, Gomeichards & Caldwell (2014) | app review                          | Top 10 free maternal and child health apps (in the Google Play and Apple App Stores)                                              | N/A                                                                                                                                                                   | N/A                        |                                                                                                                                                                                                                                                                                                                                                                                                                                 | <ul style="list-style-type: none"> <li>• Only 2 apps were assessed to meet functional requirements, security, health professional involvement and evidence-based medical content (but they were not fully usable)</li> <li>• 4/10 apps were fully functional</li> <li>• 3/10 apps had adequate security mechanisms for data privacy</li> <li>• 2/10 apps were fully usable</li> <li>• 4/10 involved health professionals in their development and evaluation.</li> <li>• 4/10 apps provided information from evidence-based medical sources.</li> </ul> | International                    |
| Tripp et al (2014)                   | app survey                          | 1049 apps iTunes, 497 apps Google Play                                                                                            | N/A                                                                                                                                                                   | N/A                        | <ul style="list-style-type: none"> <li>• Interactive/pregnancy tracking</li> <li>• Information provision</li> </ul>                                                                                                                                                                                                                                                                                                             |                                                                                                                                                                                                                                                                                                                                                                                                                                                                                                                                                         | International                    |
| Wallweiner et al (2016)              | questionnaire                       | 220 pregnant women                                                                                                                | Women had to have sufficient knowledge of German to participate<br>A range of education levels represented, majority with university entrance qualification or higher | 22%                        |                                                                                                                                                                                                                                                                                                                                                                                                                                 | Women who used apps tended to be younger, in their first pregnancy rated themselves as less healthy and were the most influenced (of the participant group) by the information they received, raising concerns about potential outcomes given the known unreliability of mobile application content.                                                                                                                                                                                                                                                    | Heidelberg and Tübingen, Germany |
| Wierckx, Shahid & Al Mahmud (2014)   | Interviews and prototype evaluation | Interviews:<br>13 nulliparous pregnant women<br>3 obstetricians<br>Evaluation:<br>11 nulliparous pregnant women<br>1 obstetrician | No information provided                                                                                                                                               | N/A                        | <p>Women:</p> <ul style="list-style-type: none"> <li>• Information provision</li> <li>• accessibility/convenience</li> <li>• Interactive/pregnancy tracking</li> <li>• Social connection</li> <li>• Communication platform between women and health professional</li> <li>• Integration with clinical pregnancy care</li> </ul> <p>Obstetricians:</p> <ul style="list-style-type: none"> <li>• information provision</li> </ul> | Obstetricians:<br>Reluctance to be contactable via an app (increase in workload)                                                                                                                                                                                                                                                                                                                                                                                                                                                                        | Netherlands                      |

| Article              | Research method             | participants/<br>data source                               | Ethnicity, socioeconomic and educational levels of participants (where applicable)                                                                                                                          | Participants who used apps | Preferred functionalities/ positive features                                                                                                                                                                                                                                                                                                                                                                                                                                                  | Identified issues with using apps                                                                                                                                                                                                                                                                                                                                                                                                                                                                                                                                                                                       | Location             |
|----------------------|-----------------------------|------------------------------------------------------------|-------------------------------------------------------------------------------------------------------------------------------------------------------------------------------------------------------------|----------------------------|-----------------------------------------------------------------------------------------------------------------------------------------------------------------------------------------------------------------------------------------------------------------------------------------------------------------------------------------------------------------------------------------------------------------------------------------------------------------------------------------------|-------------------------------------------------------------------------------------------------------------------------------------------------------------------------------------------------------------------------------------------------------------------------------------------------------------------------------------------------------------------------------------------------------------------------------------------------------------------------------------------------------------------------------------------------------------------------------------------------------------------------|----------------------|
| Willcox et al (2015) | Focus groups and interviews | 15 pregnant or postpartum women<br>12 health professionals | Women: two were born outside Australia. No other information given<br>Health professionals: two each of obstetricians, general practitioners, midwives, dieticians, physiotherapists, community pharmacists | 93.3% (14/15)              | Health professionals: <ul style="list-style-type: none"> <li>• Accessibility</li> <li>• Adjunct to health professional care</li> <li>• reliable source</li> </ul> Women: <ul style="list-style-type: none"> <li>• Accessibility</li> <li>• Reliable source/Link to clinical care</li> <li>• Videos</li> <li>• Social connection</li> <li>• Personalisation</li> <li>• Concise information, delivered in intervals</li> <li>• Integration of technology capability (cross-platform)</li> </ul> | Health professionals: <ul style="list-style-type: none"> <li>• access problems for disadvantaged women</li> <li>• medicolegal risks for health professionals</li> <li>• the potential and danger for misinterpretation of information taken "out of context"</li> <li>• increased reliance on health-related technology over health professionals</li> <li>• lack of regulatory body and health funding for technology</li> </ul> Women: <ul style="list-style-type: none"> <li>• fear of unsupportive peers or privacy breaches on social networks or forums</li> <li>• underutilised apps they already had</li> </ul> | Melbourne, Australia |
