# Supplementary material for: The Rise of Pregnancy Apps and the Implications for Culturally and Linguistically Diverse Women: Narrative Review
Source: PubMed Central journal article supplement (PMC6269626; doi:10.2196/mhealth.9119), 2018-11-16
Supplement: mhealth_v6i11e189_app3.pdf [file mhealth_v6i11e189_app3.pdf]

| Article                | Research method                                  | Participants/data source                                                                                              | Ethnicity, socioeconomic and educational levels of participants (where available)                                                                                                            | Relevant findings                                                                                                                                                                                                                                                                                                                                                                                                                                                                                                                   | Recommendations                                                                                                                                                                                                                                                                                                                                                                                                                                                                                      | Location              |
|------------------------|--------------------------------------------------|-----------------------------------------------------------------------------------------------------------------------|----------------------------------------------------------------------------------------------------------------------------------------------------------------------------------------------|-------------------------------------------------------------------------------------------------------------------------------------------------------------------------------------------------------------------------------------------------------------------------------------------------------------------------------------------------------------------------------------------------------------------------------------------------------------------------------------------------------------------------------------|------------------------------------------------------------------------------------------------------------------------------------------------------------------------------------------------------------------------------------------------------------------------------------------------------------------------------------------------------------------------------------------------------------------------------------------------------------------------------------------------------|-----------------------|
| Bensley et al (2014)   | Online survey (available in English and Spanish) | 8,114 women or caregivers of young children.                                                                          | Hispanic (47%) or Other (53%) comprising: White (57%), African American (7%), American Indian/Alaskan native (7%), Asian (6%), Native Hawaiian/Pacific Islander (3%), other or missing (20%) | <ul style="list-style-type: none"> <li>The majority (92%) owned a cell phone, (95% of millennials), over half (58%) were smart phones.</li> <li>Only 31% of respondents with smart phones used smart phone apps for parenting and health-related information.</li> <li>Younger respondents (&lt; 25yrs) were more likely to use a cell phone than another device to access the internet.</li> <li>High interest in receiving nutritional information, accessing support groups and services via technology in the future</li> </ul> | Technologies to consider for improving govt. nutritional program service provision: <ul style="list-style-type: none"> <li>text messaging for appointment reminders and nutrition education,</li> <li>online scheduling and nutrition education,</li> <li>smart phone applications to locate nearby service offices and vendors, to access approved food lists, and scan foods at the store</li> <li>a stronger Facebook presence for interacting with clients and breastfeeding support.</li> </ul> | Western USA           |
| Brusk & Bensley (2016) | Data analytics on website usage                  | 305,735 unique clients of a US-govt nutritional education program who completed 612,201 lessons over a 1-year period. | White, Black, Hispanic, Other/missing (proportions not given).                                                                                                                               | <ul style="list-style-type: none"> <li>In an evaluation of access methods for online nutritional education, Spanish language and black race (as well as residing in Alabama) were associated with a higher likelihood that the user completed their lesson using a mobile device.</li> <li>Low user engagement with program lessons was correlated with accessing the content via a mobile device</li> </ul>                                                                                                                        | Future research could address: <ul style="list-style-type: none"> <li>how the type of device used to access content affects user engagement</li> <li>whether mobile device Internet access was the initial means for these users to gain access to the Internet on a regular basis</li> <li>Design and functionality needs to cater for mobile device users</li> </ul>                                                                                                                               | US (across 21 states) |

| Article                               | Research method                                                                              | Participants/data source                                                                                                                                                            | Ethnicity, socioeconomic and educational levels of participants (where available)                                                                                                                                                | Relevant findings                                                                                                                                                                                                                                                                                                                                                                                                                                                                                                                      | Recommendations                                                                                                                                                                                                                                                                               | Location                           |
|---------------------------------------|----------------------------------------------------------------------------------------------|-------------------------------------------------------------------------------------------------------------------------------------------------------------------------------------|----------------------------------------------------------------------------------------------------------------------------------------------------------------------------------------------------------------------------------|----------------------------------------------------------------------------------------------------------------------------------------------------------------------------------------------------------------------------------------------------------------------------------------------------------------------------------------------------------------------------------------------------------------------------------------------------------------------------------------------------------------------------------------|-----------------------------------------------------------------------------------------------------------------------------------------------------------------------------------------------------------------------------------------------------------------------------------------------|------------------------------------|
| Carolan-Olah, Steele & Krenzin (2015) | Pre- and posttest questionnaire to assess web-based intervention                             | 21 pregnant women with gestational diabetes mellitus                                                                                                                                | "conversational English"<br>Country of birth: Vietnamese (6), Australian (5), India (5), China (3), Phillipines (1), Sudan (1)<br>Educational level: did not complete high school (11), completed high school (9), no answer (1) | <ul style="list-style-type: none"> <li>• Almost all participants found the intervention acceptable and pertinent to their information needs<br/>Almost all participants found it at least fairly easy to use and fairly useful.</li> <li>• 70.6% of participants improved their knowledge scores post-intervention<br/>50% improved their knowledge of food score</li> <li>• 36.8% improved their self-management score</li> </ul>                                                                                                     | From participants: <ul style="list-style-type: none"> <li>• larger pictures (10/21)</li> <li>• more ethnic specific foods (11/21)</li> <li>• less ethnic specific foods (7/21)</li> <li>• less text (3/21)</li> <li>• more information (6/21), including recipes suitable for GDM.</li> </ul> | Melbourne, Australia               |
| Chilukuri et al (2015)                | Survey                                                                                       | 246 pregnant women and mothers of children < 1 year old                                                                                                                             | Literate (in English or Spanish)<br>28% Latina, 40% black, 23% white, 9% other racial/ethnic groups                                                                                                                              | <ul style="list-style-type: none"> <li>• 95% of participants were mobile phone users</li> <li>• 74% smartphone users (55% Latinas, 77% African Americans, 84% whites, 78% other races)</li> <li>• 85% internet users (62% Latinas, 92% African Americans, 96% whites, 96% other races)</li> <li>• 74% used the internet to find health information (51% Latinas, 79% African Americans, 88% whites, 91% other races)</li> <li>• low English language proficiency and literacy are strong barriers to accessing the internet</li> </ul> | <ul style="list-style-type: none"> <li>• provide alternatives (paper) or translations</li> <li>• development of interventions incorporating culturally and linguistically appropriate elements, and designed for people with low literacy</li> </ul>                                          | Baltimore, Maryland, US            |
| Dobson et al (2017)                   | Evaluation of multilingual texting program using: program data analytics<br>phone interviews | Pregnant women and mothers of young children, and other family members: data from 1,404 individuals collected from content management system for a texting program<br>29 interviews | Maori, Pacific Islander, Chinese, Korean, Japanese and other Asian                                                                                                                                                               | Engagement: <ul style="list-style-type: none"> <li>• 1,404 individuals enrolled in program in first 18 months</li> </ul> Acceptability: <ul style="list-style-type: none"> <li>• 93% found messages useful,</li> <li>• 97% found them relevant,</li> <li>• 100% found messages culturally appropriate and easy to understand,</li> <li>• 50% reported behavioural improvements from the program,</li> <li>• 100% felt supported by program</li> <li>• 72% reported increased knowledge</li> </ul>                                      | Bidirectional messages would be useful.                                                                                                                                                                                                                                                       | Two urban districts in New Zealand |

| Article                         | Research method                                                                                   | Participants/data source                                       | Ethnicity, socioeconomic and educational levels of participants (where available)                                            | Relevant findings                                                                                                                                                                                                                                                                                                                                                                                                                                                                                                                                                                                                                                                                                                                                                                                                                                                                                                                                                                    | Recommendations                                                                                                                                                                                                                                                                              | Location             |
|---------------------------------|---------------------------------------------------------------------------------------------------|----------------------------------------------------------------|------------------------------------------------------------------------------------------------------------------------------|--------------------------------------------------------------------------------------------------------------------------------------------------------------------------------------------------------------------------------------------------------------------------------------------------------------------------------------------------------------------------------------------------------------------------------------------------------------------------------------------------------------------------------------------------------------------------------------------------------------------------------------------------------------------------------------------------------------------------------------------------------------------------------------------------------------------------------------------------------------------------------------------------------------------------------------------------------------------------------------|----------------------------------------------------------------------------------------------------------------------------------------------------------------------------------------------------------------------------------------------------------------------------------------------|----------------------|
|                                 |                                                                                                   |                                                                |                                                                                                                              | <p>and understanding.</p> <ul style="list-style-type: none"> <li>Participants also liked the personalisation of messages.</li> </ul>                                                                                                                                                                                                                                                                                                                                                                                                                                                                                                                                                                                                                                                                                                                                                                                                                                                 |                                                                                                                                                                                                                                                                                              |                      |
| Garnweidner-Holme et al (2015)  | Interviews with women (user-involvement design), health professional/researcher group discussions | 21 pregnant women with GDM, researchers, health professionals  | Norwegian (10), African (2), Asian (5), Eastern European (2), South American (2)                                             | <p>During first interview (with app prototype):</p> <ul style="list-style-type: none"> <li>women had difficulties understanding some app content and medical terminology</li> <li>Some women were confused about information that conflicted with health professional advice they had received</li> </ul> <p>During second interview (speak-aloud protocol, updated app)</p> <ul style="list-style-type: none"> <li>Only 9 participants were frequent users of apps but all (n = 21) stated that they would use the app - which featured culturally sensitive components such as Urdu and Somali translations, pictures of women from various ethnic backgrounds, and food items familiar to the cultures in question.</li> <li>Participants performed very well overall on six prescribed tasks</li> </ul> <p>Women liked the following features:</p> <ul style="list-style-type: none"> <li>Personalisation</li> <li>Interactive (real-time blood sugar level readings)</li> </ul> | <ul style="list-style-type: none"> <li>Involve patients and health professionals directly in the design of apps to increase effectiveness and usability</li> <li>Ensure close collaboration between app developers and healthcare professionals to eliminate potential confusion.</li> </ul> | Norway               |
| Grimes, Forster & Newton (2014) | Postal questionnaire                                                                              | 350 primiparous women who had given birth in previous 4 months | All socioeconomic and educational levels represented<br>118 participants were born outside Australia, 122 identified as NESB | internet cited as the most used source of pregnancy information by NESB women                                                                                                                                                                                                                                                                                                                                                                                                                                                                                                                                                                                                                                                                                                                                                                                                                                                                                                        |                                                                                                                                                                                                                                                                                              | Melbourne, Australia |

| Article                                        | Research method                               | Participants/data source                                          | Ethnicity, socioeconomic and educational levels of participants (where available)                                                                                                                                                                                                                                                                                                      | Relevant findings                                                                                                                                                                                                                                                                                                                                                                                                                                                                                                                                                                                                                                                                     | Recommendations                                                                                                                                                 | Location                     |
|------------------------------------------------|-----------------------------------------------|-------------------------------------------------------------------|----------------------------------------------------------------------------------------------------------------------------------------------------------------------------------------------------------------------------------------------------------------------------------------------------------------------------------------------------------------------------------------|---------------------------------------------------------------------------------------------------------------------------------------------------------------------------------------------------------------------------------------------------------------------------------------------------------------------------------------------------------------------------------------------------------------------------------------------------------------------------------------------------------------------------------------------------------------------------------------------------------------------------------------------------------------------------------------|-----------------------------------------------------------------------------------------------------------------------------------------------------------------|------------------------------|
| Guendelman et al (2017)                        | Focus groups                                  | 92 pregnant women and mothers of young children (14 focus groups) | literate (in English)<br>low socioeconomic status<br>8 white, 40 black, 22 Latina, 15 Asian, 7 mixed race or other race                                                                                                                                                                                                                                                                | <ul style="list-style-type: none"> <li>• very high access to smartphones and computers</li> <li>• high use of the Internet for health information-seeking</li> <li>• low use of digital tools for health management practices</li> </ul>                                                                                                                                                                                                                                                                                                                                                                                                                                              |                                                                                                                                                                 | U.S.-multi-site              |
| Guerra-Reyes, Christie, Prabakar & Siek (2017) | survey                                        | 77 postpartum women                                               | American Indian or Alaska native (1.3%), Asian (6.5%), Black or African-American (5.2%), White (74%), More than one race (5.2%, not reported (7.8%), Hispanic or Latino ethnicity (3.9%)<br>Range of education levels, predominantly with some college (28.6%) or with a Bachelor's degree or higher (42.9%). High school or less 20.8%.<br>Low income (42.9%) and high income (57.1%) | <ul style="list-style-type: none"> <li>• 77% of participants owned smartphones</li> <li>• 48% of those with smartphones used pregnancy apps</li> </ul>                                                                                                                                                                                                                                                                                                                                                                                                                                                                                                                                | Participants reported using varied sources of health information during pregnancy, but 44% still experienced one or more postpartum gaps in health information. | Monroe County, Indiana, U.S. |
| Narasimhulu et al (2016)                       | survey<br>expert review of online information | 503 pregnant/postpartum women<br>5 experts                        | Able to read and write in English (although, primary language was other than English for 38.1% of participants)<br>An underserved racially diverse inner-city population: White (38.9%), African American (16.4%), Hispanic (13.4%), Asian (25.7%), other (5.6%)                                                                                                                       | <p>Women</p> <ul style="list-style-type: none"> <li>• 70.8 % were e-health users.</li> <li>• E-health users were younger, more likely to be nulliparous, have English as their primary language and have a college education.</li> <li>• 60 % said e-health influenced their decision making</li> <li>• Only 71.3 % discussed their searches with their provider.</li> <li>• Device most commonly used to access the internet: 85% computer, 67.1% smartphone, 34.4% tablet, 0.7% other.</li> </ul> <p>Expert review of pregnancy information websites:</p> <ul style="list-style-type: none"> <li>• For each of five pregnancy questions, at least one website out of ten</li> </ul> | Healthcare providers have a vital role in suggesting high-quality online information.                                                                           | Brooklyn, NY, US             |

| Article                         | Research method        | Participants/data source                                                                      | Ethnicity, socioeconomic and educational levels of participants (where available)                                                                                                                                                                                                                                                                                       | Relevant findings                                                                                                                                                                                                                                                                                                                                                                                                                    | Recommendations                                                                                                                                                                                                                                                                                                                                                                                                                                              | Location      |
|---------------------------------|------------------------|-----------------------------------------------------------------------------------------------|-------------------------------------------------------------------------------------------------------------------------------------------------------------------------------------------------------------------------------------------------------------------------------------------------------------------------------------------------------------------------|--------------------------------------------------------------------------------------------------------------------------------------------------------------------------------------------------------------------------------------------------------------------------------------------------------------------------------------------------------------------------------------------------------------------------------------|--------------------------------------------------------------------------------------------------------------------------------------------------------------------------------------------------------------------------------------------------------------------------------------------------------------------------------------------------------------------------------------------------------------------------------------------------------------|---------------|
|                                 |                        |                                                                                               |                                                                                                                                                                                                                                                                                                                                                                         | reviewed was found to provide inaccurate information.                                                                                                                                                                                                                                                                                                                                                                                |                                                                                                                                                                                                                                                                                                                                                                                                                                                              |               |
| Osma et al. (2016)              | online survey          | 249 English-speaking and 247 Spanish-speaking pregnant or postnatal women (from 59 countries) | African-American/Black (8.2%), Alaskan native or American Indian (0.7%), Asian (18.4%), European American or White (21.5%), Mestizo (24.4%), Native Hawaiian (0.4%), Pacific Islander (0.7%), More than one race (3.1%), others (22.6%)<br>Middle (85.5%) and Low (14.5%) socioeconomic status,<br>Range of education levels but highest group university level (39.9%) |                                                                                                                                                                                                                                                                                                                                                                                                                                      | <ul style="list-style-type: none"> <li>47.5% of sample owned mobile phone (but of these, 72.3% used health-related apps).</li> <li>Significant differences in socioeconomic status were found for Internet seeking behaviour of health-related information and downloading apps between those with and without Internet access (presumably because the latter don't own ICT devices - in spite of the fact that the survey was completed online).</li> </ul> | international |
| Peragallo Urrutia et al. (2015) | Written survey         | 100 pregnant women                                                                            | 61 white, 26 black, 6 Hispanic and 7 Asian women                                                                                                                                                                                                                                                                                                                        | <ul style="list-style-type: none"> <li>Very high general use of and access to the Internet via computer (89%) and/or mobile phone (89%), slightly less access amongst non-white women and those with children already.</li> <li>49% were willing to participate in a mobile-based internet intervention, 83% in a computer-based intervention.</li> <li>No statistically significant differences for race or income level</li> </ul> |                                                                                                                                                                                                                                                                                                                                                                                                                                                              | southern U.S. |
| Sundstrom (2016)                | qualitative interviews | 44 postnatal women                                                                            | English-speaking, White (64%), Hispanic (25%), Black (7%), Asian (4%)<br>Education level less than college (56%), College degree or higher (44%)                                                                                                                                                                                                                        | <ul style="list-style-type: none"> <li>A high proportion of respondents used pregnancy apps (number not stated).</li> <li>Reliable source</li> <li>Social connection (but not as contributors, only observers)</li> </ul>                                                                                                                                                                                                            | Some participants chose not to use apps during pregnancy due to privacy concerns                                                                                                                                                                                                                                                                                                                                                                             | Urban U.S.    |

| Article             | Research method | Participants/data source | Ethnicity, socioeconomic and educational levels of participants (where available)                                                                                                                                                | Relevant findings                                                                                                                                                                                                                                                                                                                                                                                                                                                                                                    | Recommendations                                                                                                                                                                                                      | Location |
|---------------------|-----------------|--------------------------|----------------------------------------------------------------------------------------------------------------------------------------------------------------------------------------------------------------------------------|----------------------------------------------------------------------------------------------------------------------------------------------------------------------------------------------------------------------------------------------------------------------------------------------------------------------------------------------------------------------------------------------------------------------------------------------------------------------------------------------------------------------|----------------------------------------------------------------------------------------------------------------------------------------------------------------------------------------------------------------------|----------|
| Waring et al (2014) | questionnaire   | 64 pregnant women        | English speaking<br>Non-Hispanic White (48%), African American (13%), Hispanic (28%), other race/ethnicity (11%)<br>Education level high school or less (42%), high school or some college (30%), college degree or higher (28%) | <ul style="list-style-type: none"> <li>• 94% of participants looked online for pregnancy information</li> <li>• 95% had used the Internet in the past four weeks (89% daily)</li> <li>• Smartphones were the most commonly used device (84% of participants), followed by 66% via laptop, 49% via desktop computer, 31% via tablet, and 23% another device.</li> <li>• 86% overall were interested in using a website or mobile application to help them gain a healthy amount of weight during pregnancy</li> </ul> | The study results suggest that Internet-delivered gestational weight gain interventions should be designed to be accessible via smartphones and other mobile devices in addition to via desktop or laptop computers. | US       |
